# Supplementary material for: Diagnostic and Prognostic Value of Conventional Brain MRI in the Clinical Work-Up of Patients with Amyotrophic Lateral Sclerosis
Source: J Clin Med. 2020 Aug 6;9(8):2538. doi: 10.3390/jcm9082538 (PMC7463468; doi:10.3390/jcm9082538)
Supplement: Supplementary file 1 [file jcm-09-02538-s001.pdf]

# Supplementary Materials

**Table S1.** Details of the sequences included in the MRI protocol

| SEQUENCES   | TR (ms) | TE (ms) | FLIP ANGLE | MATRIX  | THICKNESS (mm) |
|-------------|---------|---------|------------|---------|----------------|
| 3D-FSPGR-T1 | 9       | 4       | 13°        | 512x512 | 1              |
| FSE-T2      | 4000    | 111     | 90°        | 512x512 | 4              |
| GRE-T2*     | 1000    | 20      | 17°        | 320x256 | 4              |
| FLAIR-T2    | 9000    | 146     | 90°        | 320x320 | 4              |
| SWI         | 77      | 42      | 15°        | 320x224 | 1              |

3D-FSPGR = Three-dimensional Fast Spoiled Gradient-Echo. FSE = Fast Spin-Echo. GRE = Gradient-Echo. FLAIR = Fluid Attenuated Inversion Recovery. SWI = Susceptibility-Weighted Imaging

**Table S2.** Comparison of the prevalence of MRI features between patients clinically possible ALS according to the revised El Escorial criteria and controls.

|                                             | Corticospinal tract FLAIR hyperintensity | Corticospinal tract T2 hyperintensity | Motor cortex SWI hypointensity | Motor cortex T2* hypointensity | Selective motor cortex atrophy |
|---------------------------------------------|------------------------------------------|---------------------------------------|--------------------------------|--------------------------------|--------------------------------|
| <b>Clinically possible ALS</b>              | 14/20 (70%)                              | 8/20 (40%)                            | 13/18 (72%)                    | 3/10 (30%)                     | 12/18 (67%)                    |
| <b>Controls</b>                             | 28/87 (32%)                              | 6/87 (7%)                             | 13/33 (39%)                    | 8/63 (13%)                     | 43/88 (49%)                    |
| <b><math>\chi^2</math>-test (corrected)</b> | $p = 0.01$                               | $p = 0.005$                           | n.s.                           | n.s.                           | n.s.                           |

Numerator indicates how many patients had the MRI feature and the denominator indicates in how many patients the sequence was available, n.s., not significant.

**Table S3.** Comparison of the prevalence of MRI features between ALS patients with and without mutations.

|                                             | Corticospinal tract FLAIR hyperintensity | Corticospinal tract T2 hyperintensity | Motor cortex SWI hypointensity | Motor cortex T2* hypointensity | Selective motor cortex atrophy |
|---------------------------------------------|------------------------------------------|---------------------------------------|--------------------------------|--------------------------------|--------------------------------|
| <b>Patients without mutations</b>           | 62/80 (78%)                              | 38/80 (48%)                           | 54/72 (75%)                    | 10/36 (28%)                    | 53/79 (67%)                    |
| <b>Patients with mutations</b>              | 7/12 (58%)                               | 4/12 (33%)                            | 8/10 (80%)                     | 1/7 (14%)                      | 10/12 (83%)                    |
| <b><math>\chi^2</math>-test (corrected)</b> | n.s.                                     | n.s.                                  | n.s.                           | n.s.                           | n.s.                           |

Numerator indicates how many patients had the MRI feature and the denominator indicates in how many patients the sequence was available. n.s., not significant.

**Table S4.** Comparison of the prevalence of MRI features between ALS patients, excluding patients with mutations, and controls.

|                                             | Corticospinal tract FLAIR hyperintensity | Corticospinal tract T2 hyperintensity | Motor cortex SWI hypointensity | Motor cortex T2* hypointensity | Selective motor cortex atrophy |
|---------------------------------------------|------------------------------------------|---------------------------------------|--------------------------------|--------------------------------|--------------------------------|
| <b>Patients</b>                             | 62/80 (78%)                              | 38/80 (48%)                           | 54/72 (75%)                    | 10/36 (28%)                    | 53/79 (67%)                    |
| <b>Controls</b>                             | 28/87 (32%)                              | 6/87 (7%)                             | 13/33 (39%)                    | 8/63 (13%)                     | 43/88 (49%)                    |
| <b><math>\chi^2</math>-test (corrected)</b> | $p < 0.0001$                             | $p < 0.0001$                          | $p = 0.0026$                   | n.s.                           | n.s.                           |

Numerator indicates how many patients had the MRI feature and the denominator indicates in how many patients the sequence was available, n.s., not significant.

**Table S5.** Comparison of the prevalence of MRI features between ALS patients, excluding patients who developed dementia, and controls.

|                                                 | Corticospinal tract<br>FLAIR<br>hyperintensity | Corticospinal tract T2<br>hyperintensity | Motor cortex SWI<br>hypointensity | Motor cortex T2*<br>hypointensity | Selective motor<br>cortex atrophy |
|-------------------------------------------------|------------------------------------------------|------------------------------------------|-----------------------------------|-----------------------------------|-----------------------------------|
| <b>Patients</b>                                 | 66/88 (75%)                                    | 41/88 (47%)                              | 59/79 (75%)                       | 11/41 (27%)                       | 59/87 (68%)                       |
| <b>Controls</b>                                 | 28/87 (32%)                                    | 6/87 (7%)                                | 13/33 (39%)                       | 8/63 (13%)                        | 43/88 (49%)                       |
| <b><math>\chi^2</math>-test<br/>(corrected)</b> | $p < 0.0001$                                   | $p < 0.0001$                             | $p = 0.002$                       | n.s.                              | $p = 0.04$                        |

Numerator indicates how many patients had the MRI feature and the denominator indicates in how many patients the sequence was available, n.s., not significant.
